# Supplementary material for: H2-oxidation driven by its behavior of losing an electron over B-doped TiO2 under UV irradiation
Source: Royal Society of Chemistry journal article supplement (doi:10.1039/d0cp04039h), 2020-11-23
Supplement: d0cp04039h1.pdf [file d0cp04039h1.pdf]

## Electrical Supporting Information (ESI)

### **H<sub>2</sub> oxidation driven by its losing electron behavior over B doped TiO<sub>2</sub> under UV irradiation**

*Xiaoxiao Wang<sup>a,b</sup>, Kun Wang<sup>a,b</sup>, Hong Wang<sup>a,b</sup>, Zhongming Wang<sup>a,b</sup>, Xun Chen<sup>a</sup>,  
Wenxin Dai<sup>a,b\*</sup>, Xianzhi Fu<sup>a</sup>*

<sup>a</sup> Research Institute of Photocatalysis, State Key Laboratory of Photocatalysis on Energy and Environment, Fuzhou University, Fuzhou, 350108, China

<sup>b</sup> Key Laboratory of Eco-materials Advanced Technology (Fuzhou University), Fujian Province University, Fuzhou, 350108, China

\*Corresponding author: Wenxin Dai & Xianzhi Fu

Tel & Fax: +86-591-22865893

E-mail: daiwenxin@fzu.edu.cn & xzfu@fzu.edu.cn

---

## 1. Light resource

(a) Four UV lamps with a wavelength centered at 365 nm (4 W, Philips TL/05) were used as the irradiation source and the total light intensity on the surface of sensing film was  $7.3 \text{ mW cm}^{-2}$ ,

(b) The UV light was supplied by a 500W Xe lamp, which was as the light source in other experiments, including electrochemical testing, electron paramagnetic resonance (EPR) and photocatalytic performances.

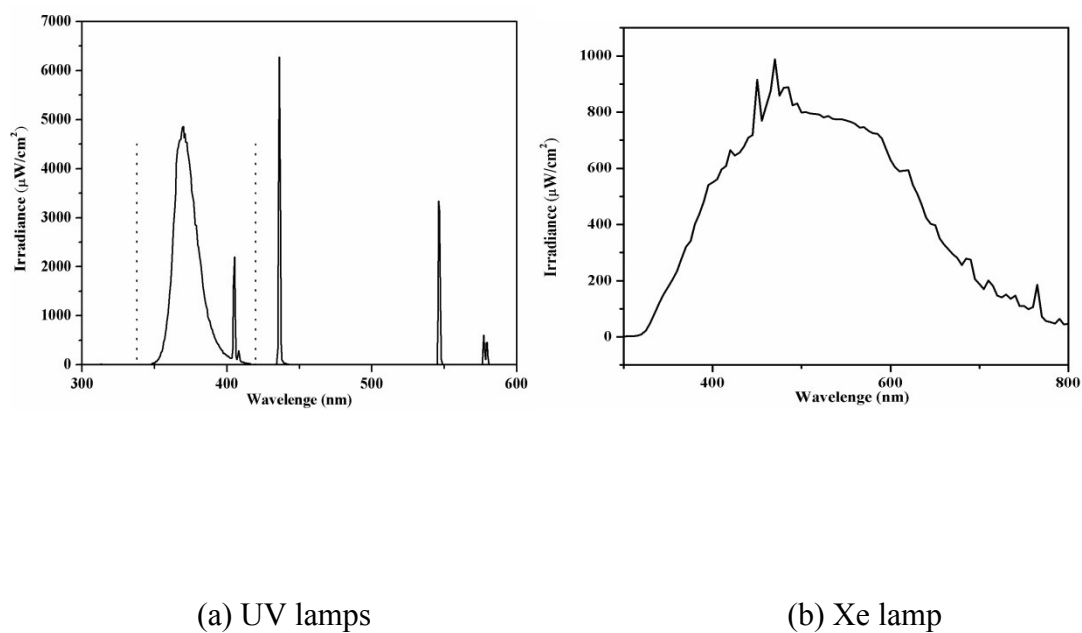

**Fig. S1** Spectrogram of the two light sources used in the experiment: (a) UV lamps and (b) Xe lamp.

---

## **2. Photo-current response results of TiO<sub>2</sub> and B-TiO<sub>2</sub>**

In Fig. S2, we could find that both TiO<sub>2</sub> and B-TiO<sub>2</sub> generated a certain photo-current when the ultraviolet light was introduced, and the current intensity was large. When the light source was cut off, the current decreased rapidly, and the photo-current intensity of two samples was different. The photo-current curve of TiO<sub>2</sub> generally showed a declining trend with the extension of the test time, and then maintained a relatively stable state, while the photo-current intensity of B-TiO<sub>2</sub> was significantly less than that of TiO<sub>2</sub>, but the overall decay degree was weaker. After doping B, the photo-current intensity became weaker, this was due to the lack of electron characteristics of boron. The hole density increased after doping B, which could capture photo-generated electrons, causing the photo-current intensity to weaken.

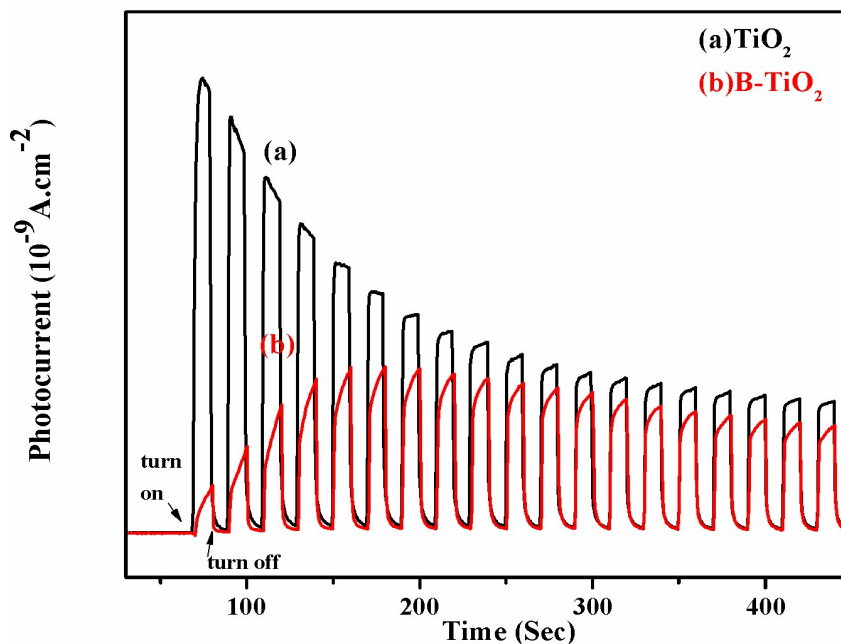

**Fig. S2** Photo-current response results of (a) TiO<sub>2</sub> and (b) B-TiO<sub>2</sub> in 0.02 M Na<sub>2</sub>SO<sub>4</sub> (aq) under the UV light irradiation.

### 3. Electrochemical impedance spectroscopy of TiO<sub>2</sub> and B-TiO<sub>2</sub>

Fig. S3 shows the impedance plots of TiO<sub>2</sub> and B-TiO<sub>2</sub> under UV irradiation and the equivalent circuit model in Fig. S3 was used to fit the Nyquist plot. We could find that TiO<sub>2</sub> had a smaller radius of the arc in the EIS spectra than B-TiO<sub>2</sub>, which implied that doping B was unbenefit for efficient separation of the photogenerated charges and electron transport. The EIS result was consistent with the photo-current result. The reason for it may also because B is an electron-deficient element, which would capture the photo-generated electrons.

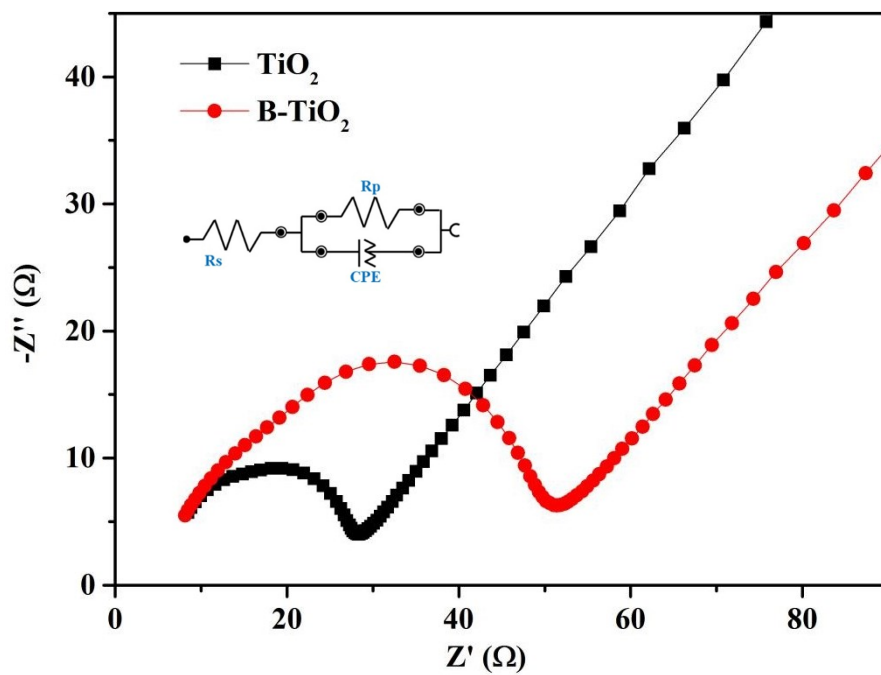

**Fig. S3** Electrochemical impedance spectroscopy (EIS) of  $\text{TiO}_2$  and  $\text{B-TiO}_2$  under the UV light irradiation.

#### 4. Photocatalytic activities of $\text{TiO}_2$ and different $\text{B-TiO}_2$ samples

A series of  $\text{B-TiO}_2$  catalysts with different amount of B doping were synthesized

to determine the optimal amount of B doping, and the atomic ratio of B to Ti are 0, 0.5, 1, 1.5 and 2, respectively. The photocatalytic activity test results indicated that the atomic ratio of B to Ti is 1 had the best activity for H<sub>2</sub> oxidation, as shown in Table S1. Consequently, it was the optimal amount of B doping. In addition, the photocatalytic activity for H<sub>2</sub> oxidation over B<sub>2</sub>O<sub>3</sub> had also been tested and the experiment result demonstrated that it could not play a role in the H<sub>2</sub> oxidation reaction, which was also shown in Table S1. The XRD of TiO<sub>2</sub> and B-TiO<sub>2</sub> with different atomic ratio of B to Ti were shown in Fig. S4, which indicated that the different samples were successfully prepared .

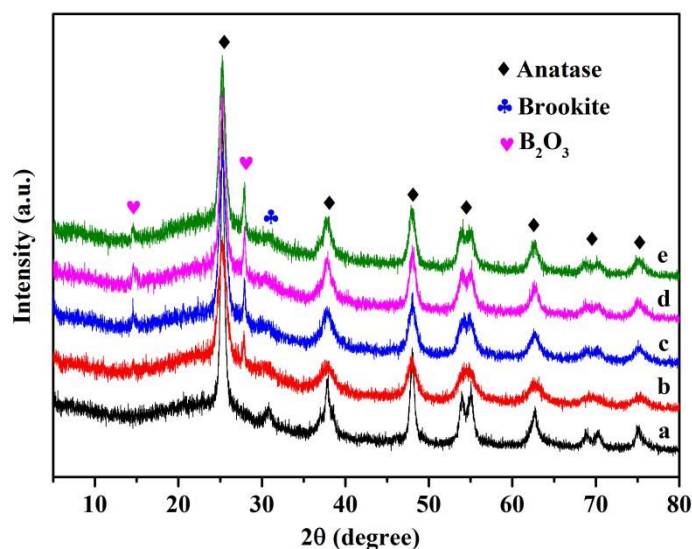

**Fig. S4** XRD of B-TiO<sub>2</sub> with different atomic ratio of B to Ti : (a) 0; (b) 0.5; (c) 1; (d) 1.5; (e) 2.

**Table S1** The results of catalytically oxidizing H<sub>2</sub> over B<sub>2</sub>O<sub>3</sub> and a series of B-TiO<sub>2</sub> catalysts under UV irradiation at room temperature.

| Samples                       | The initial concentration of H <sub>2</sub> (ppm) | The concentration of H <sub>2</sub> in dark for 1h (ppm) | The concentration of H <sub>2</sub> under UV light for 1h (ppm) | Characteristic                       |
|-------------------------------|---------------------------------------------------|----------------------------------------------------------|-----------------------------------------------------------------|--------------------------------------|
| B <sub>2</sub> O <sub>3</sub> | 55697.51                                          | 54485.18(-1212.33) <sup>a</sup>                          | 54088.84(-396.34) <sup>a</sup>                                  | H <sub>2</sub> not oxidized          |
| TiO <sub>2</sub>              | 67670.95                                          | 60491.94(-7179.01) <sup>a</sup>                          | 56961.28(-3530.66) <sup>a</sup>                                 | H <sub>2</sub> not oxidized          |
| 0.5 <sup>c</sup>              | 65409.54                                          | 56940.08(-8469.46) <sup>a</sup>                          | 47977.94(-8962.14) <sup>a</sup>                                 | <sup>b</sup> H <sub>2</sub> oxidized |
| 1 <sup>c</sup>                | 58185.24                                          | 52830.41(-5354.83) <sup>a</sup>                          | 41073.32(-11757.09) <sup>a</sup>                                | <sup>b</sup> H <sub>2</sub> oxidized |
| 1.5 <sup>c</sup>              | 61913.84                                          | 57573.54(-4340.30) <sup>a</sup>                          | 51379.8(-6193.74) <sup>a</sup>                                  | <sup>b</sup> H <sub>2</sub> oxidized |
| 2 <sup>c</sup>                | 63462.28                                          | 59380.04(-4082.24) <sup>a</sup>                          | 54429.73(-4950.30) <sup>a</sup>                                 | <sup>b</sup> H <sub>2</sub> oxidized |

a-The concentration decrease value of H<sub>2</sub> in dark or under UV light for 1h (ppm).

b- O<sub>2</sub> contents (not shown here) also decreased, indicating that H<sub>2</sub> was oxidized by O<sub>2</sub>.

c-The atomic ratio of B to Ti
